# Supplementary material
Source: PubMed Central journal article supplement (PMC3059082)

**a**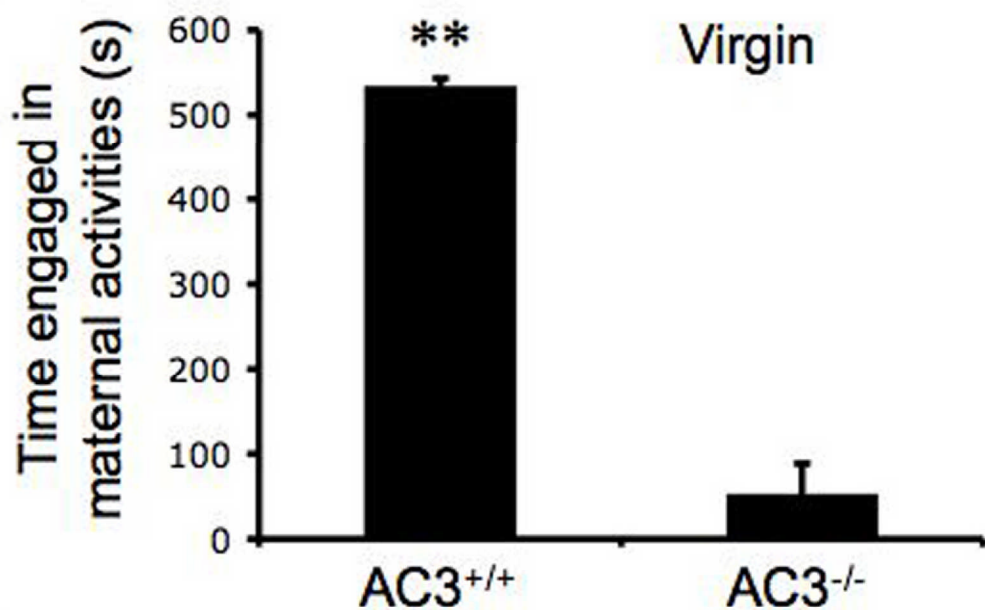**b**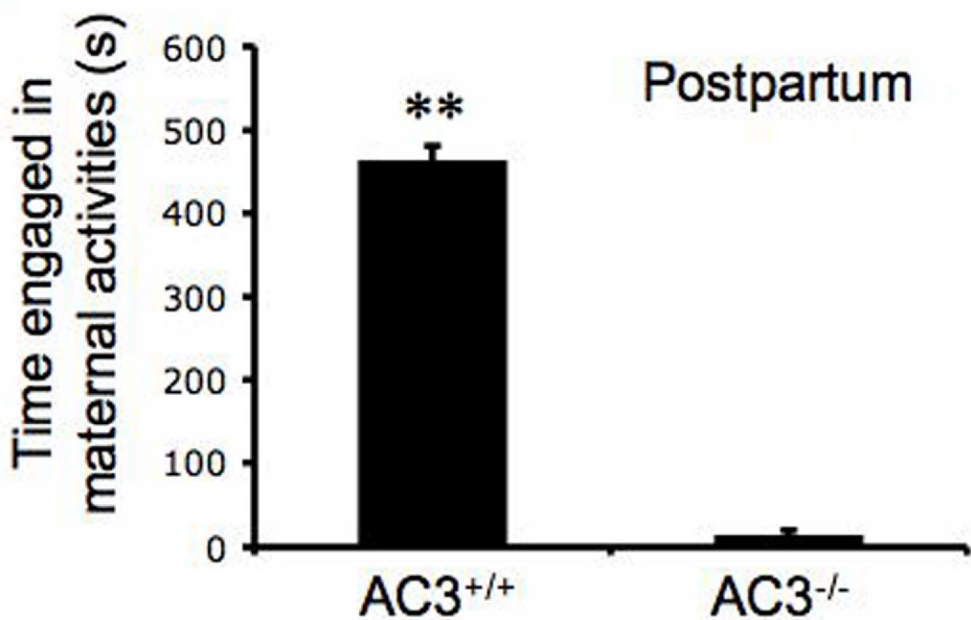

Supplement: NIHMS250666-supplement-01.pdf [file NIHMS250666-supplement-01.pdf]
